# Supplementary material for: Cellulose nanocrystal/halloysite nanotube composite aerogels for water purification
Source: Royal Society of Chemistry journal article supplement (doi:10.1039/d3dt01908j), 2023-01-01
Supplement: d3dt01908j1.pdf [file d3dt01908j1.pdf]

## Supporting Information

### **Cellulose nanocrystal/halloysite nanotube composite aerogels for water purification**

*Huan Gao,<sup>a,b</sup> Miguel A. Soto,<sup>a</sup> Zongzhe Li,<sup>a</sup> Lucas J. Andrew<sup>a</sup> and Mark J. MacLachlan<sup>a,c,d\*</sup>*

<sup>a</sup> *Department of Chemistry, University of British Columbia, 2036 Main Mall, Vancouver, BC, V6T 1Z1, Canada.*

<sup>b</sup> *School of Chemistry and Materials Science, Nanjing Normal University, Nanjing, 210023, China*

<sup>c</sup> *Stewart Blusson Quantum Matter Institute, University of British Columbia, 2355 East Mall, Vancouver, BC, V6T 1Z4 Canada*

<sup>d</sup> *WPI Nano Life Science Institute, Kanazawa University, Kanazawa, 920-1192, Japan*

Corresponding Author

Mark J. MacLachlan\* E-mail: [mmaclach@chem.ubc.ca](mailto:mmaclach@chem.ubc.ca)

## Table of contents for supplementary information

|                                                                     |     |
|---------------------------------------------------------------------|-----|
| 1. TEM images of CNCs and HNTs.....                                 | S2  |
| 2. $\zeta$ -potential measurements.....                             | S2  |
| 3. Young's moduli results.....                                      | S2  |
| 4. Compressive stress-strain tests.....                             | S3  |
| 5. Photographs of aerogels.....                                     | S3  |
| 6. SEM mapping of CNC-HNT-0.4.....                                  | S4  |
| 7. The feasibility of CNC-HNT related aerogels.....                 | S5  |
| 8. Control experiments.....                                         | S5  |
| 9. The effect of initial MB concentration.....                      | S5  |
| 10. Reusability of CNC-HNT-0.4 aerogel.....                         | S6  |
| 11. SEM image and PXRD pattern of sorbents after MB adsorption..... | S6  |
| 12. UV-vis spectra of different pH and ionic strength on MB.....    | S6  |
| 13. Adsorption capacity of CNC-HNT-0.4.....                         | S7  |
| 14. UV-vis adsorption spectra for adsorption kinetics.....          | S7  |
| 15. Adsorption kinetic data fitting pseudo-first order.....         | S7  |
| 16. Kinetic parameters of fitting pseudo-first order model.....     | S8  |
| 17. Comparison of the different adsorbents.....                     | S8  |
| 18. SEM images for sorbents after MB adsorption.....                | S9  |
| 19. Absorption effect for different types of dyes.....              | S9  |
| 20. References.....                                                 | S10 |

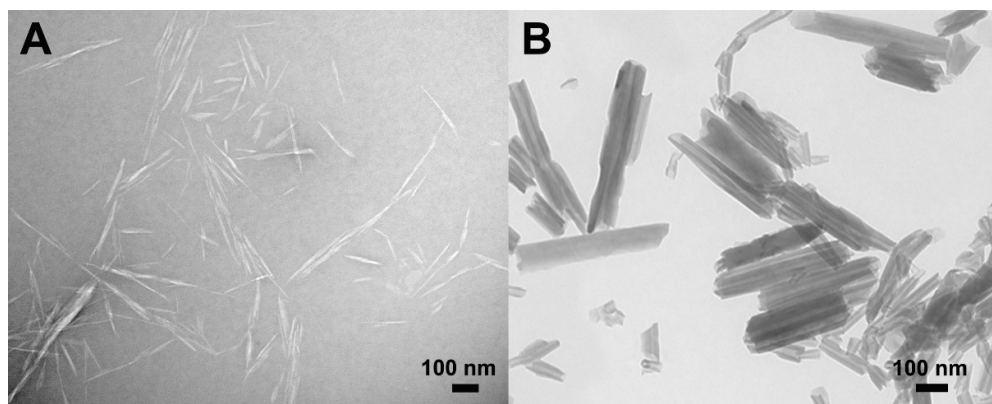

**Fig. S1** TEM images of (A) CNCs and (B) HNTs.

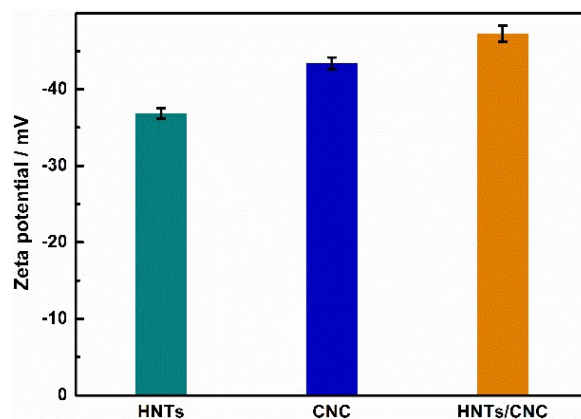

**Fig. S2**  $\zeta$ -potential measurements for HNT, CNC and HNT/CNC suspensions. The error bars represent the standard deviations based on three independent tests of the same sample.

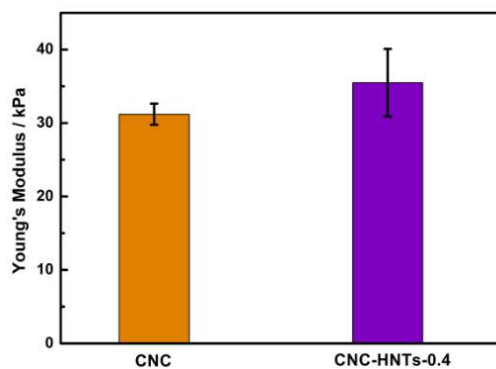

**Fig. S3** Young's moduli of CNC aerogel and CNC-HNT-0.4. The error bars represent the standard deviations based on three independent tests of samples with the same composition.

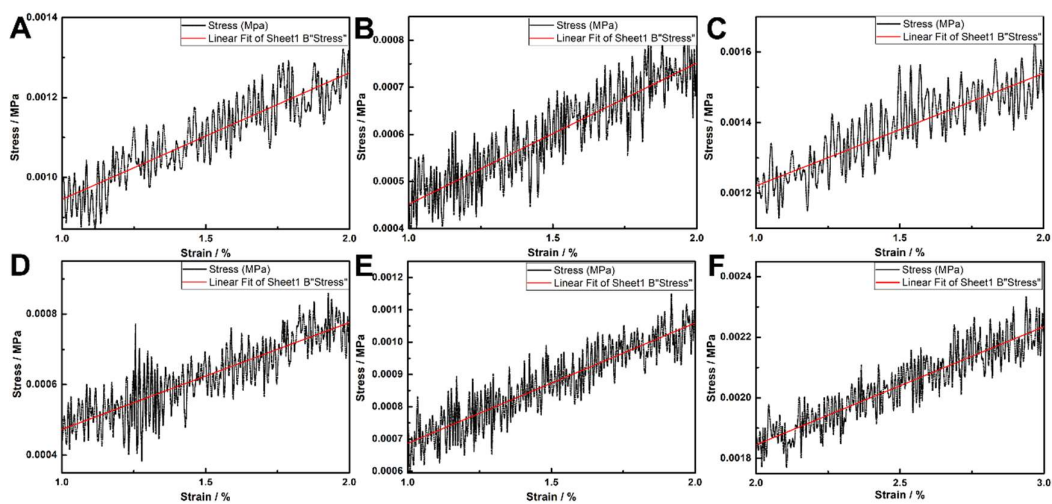

**Fig. S4** Compressive stress-strain curves of CNC aerogel (A, B, C; these correspond to three independent samples) and CNC-HNT-0.4 (D, E, F).

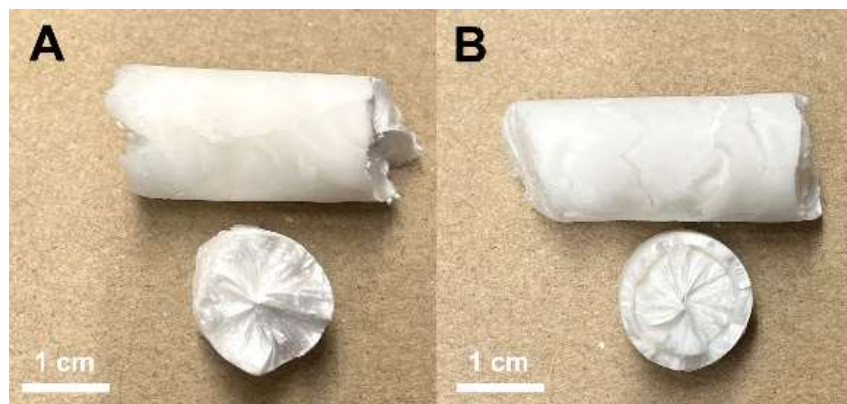

**Fig. S5** Photographs of (A) CNC aerogel and (B) CNC-HNT-0.4.

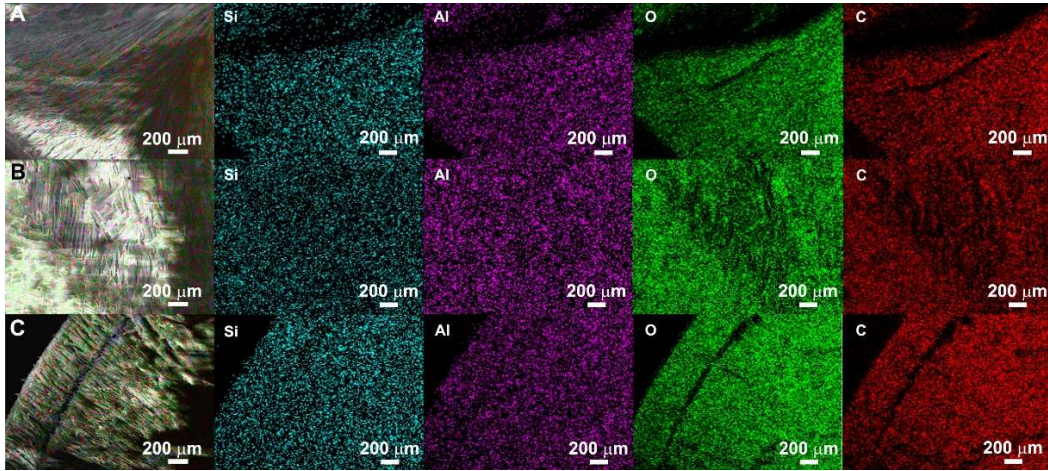

**Fig. S6** (A, B and C) SEM-EDX mapping of three different spots on the top of CNC-HNT-0.4.

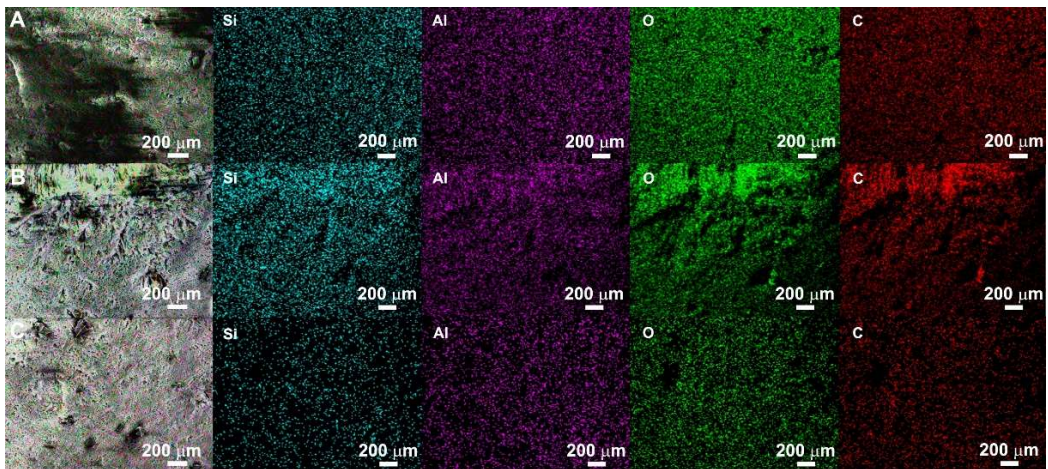

**Fig. S7** (A, B and C) SEM-EDX mapping of three different spots on the side of CNC-HNT-0.4.



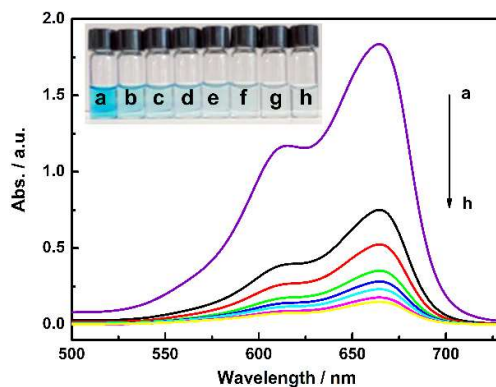

**Fig. S8** Initial removal tests using CNC-HNT aerogels. The starting MB solution concentration was  $10 \text{ mg}\cdot\text{L}^{-1}$ . Spectra show absorbance of (a) the initial MB solution ( $10 \text{ mg}\cdot\text{L}^{-1}$ ) and (b-h) the residual solutions after sorption with (b) CNC, (c) CNC-HNT-0.1, (d) CNC-HNT-0.2, (e) CNC-HNT-0.3, (f) CNC-HNT-0.4, (g) CNC-HNT-0.5 and (h) CNC-HNT-0.6 (from b to h). The inset shows photos of (a) the initial MB solution ( $10 \text{ mg}\cdot\text{L}^{-1}$ ) and (b-h) the corresponding residual solutions after sorption.

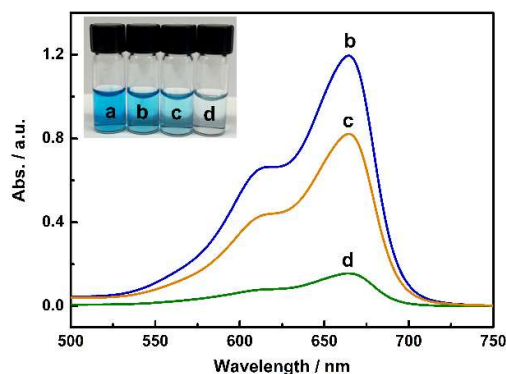

**Fig. S9** UV-vis spectra of residual MB in solutions after treatment with (b) HNTs, (c) CNC aerogel and (d) CNC-HNT-0.4. The inset shows photos correspond to (a) the initial MB solution ( $10 \text{ mg}\cdot\text{L}^{-1}$ ) and (b-d) the corresponding residual solutions after sorption.

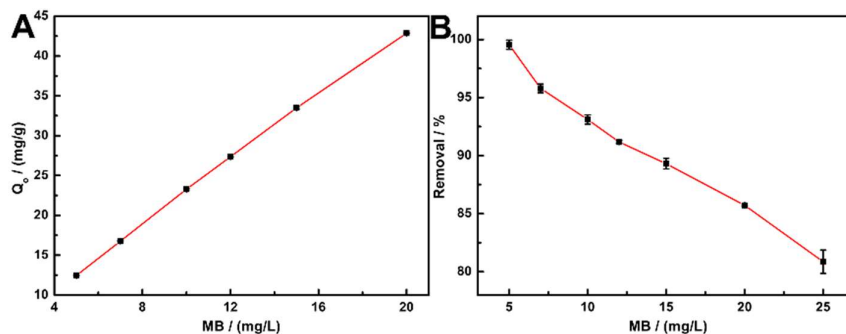

**Fig. S10** Effect of initial dye concentration on (A) the adsorption capacity and (B) the removal efficiency of MB. MB concentration  $5\text{-}20 \text{ mg}\cdot\text{L}^{-1}$ , CNC-HNT-0.4  $4 \text{ mg}$ . Error bars are the standard deviations corresponding to three independent experiments.

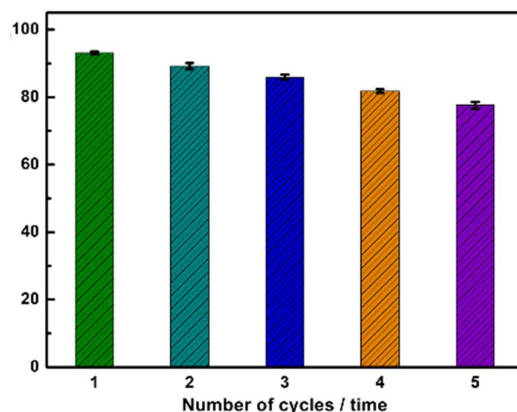

**Fig. S11** Reusability of CNC-HNT-0.4 aerogel as MB adsorbent for five successive cycles. Error bars are the standard deviations corresponding to three independent experiments with the same samples.

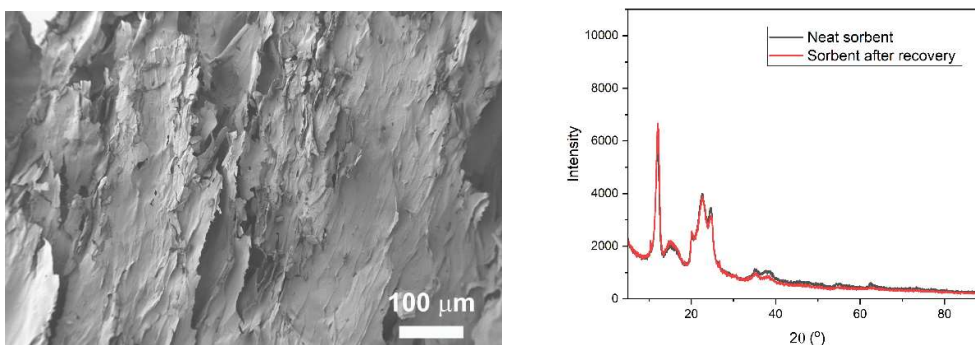

**Fig. S12** SEM image (A) and PXRD pattern (B) of CNC-HNT-0.4 sorbents after MB desorption.

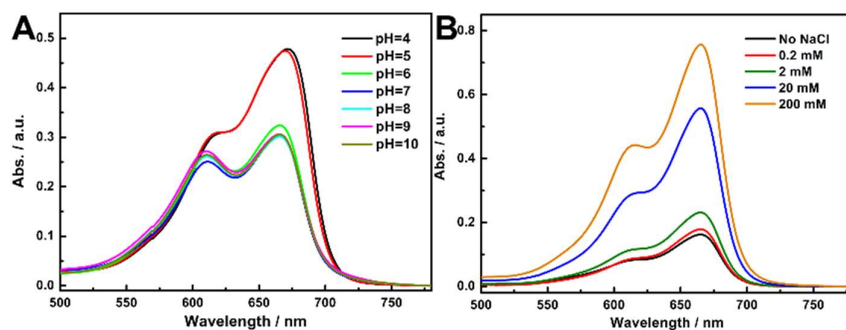

**Fig. S13** UV-vis spectra for MB adsorption capacity tests at (A) different pH and (B) different ionic strength. MB concentration  $10 \text{ mg}\cdot\text{L}^{-1}$ , CNC-HNT-0.4 4 mg, equilibration time 360 min, room temperature.

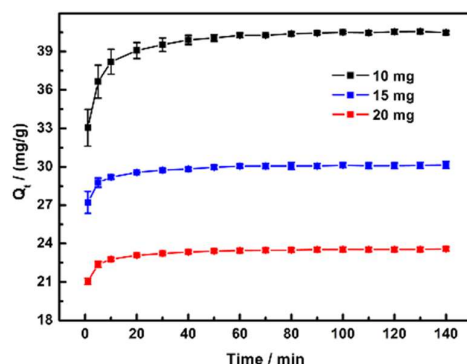

**Fig. S14** Adsorption capacity as a function of adsorption time for MB adsorption. CNC-HNT-0.4 10 mg (black), 15 mg (blue) and 20 mg (red); 50 mL solution of MB with a concentration of  $10 \text{ mg}\cdot\text{L}^{-1}$ . Error bars are the standard deviations corresponding to three independent experiments with the same samples.

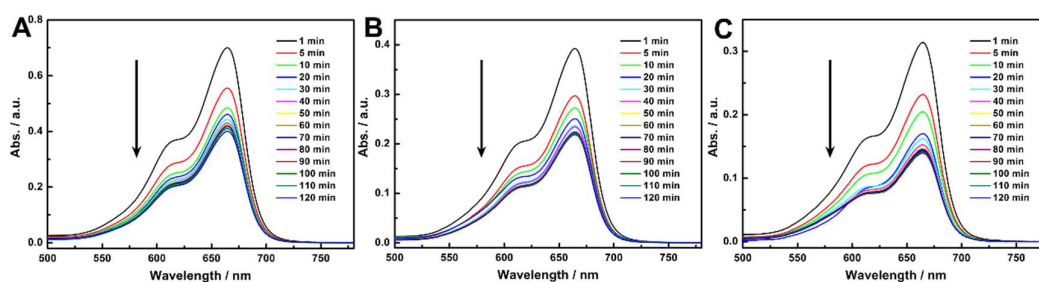

**Fig. S15** Successive UV-vis absorption spectra of MB solution in the presence of (A) 10 mg, (B) 15 mg, and (C) 20 mg of CNC-HNT-0.4.

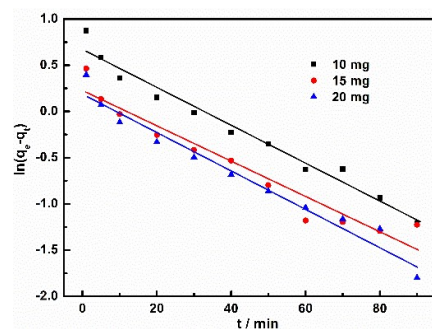

**Fig. S16** Data fitting to pseudo-first order kinetic model; CNC-HNT-0.4 aerogel 10 mg (black), 15 mg (red) and 20 mg (blue). The data were collected from three independent experiments.



**Table S1.** Kinetic parameters obtained from the fitting to a pseudo-first order model.

| Adsorbent<br>(mg) | Experimental<br>$Q_e$ (mg·g <sup>-1</sup> ) | Pseudo-first order            |                                    |       |
|-------------------|---------------------------------------------|-------------------------------|------------------------------------|-------|
|                   |                                             | $K_1$<br>(min <sup>-1</sup> ) | $Q_{e,1}$<br>(mg·g <sup>-1</sup> ) | $R^2$ |
| 10                | 40.51                                       | 0.0474                        | 4.68                               | 0.974 |
| 15                | 30.12                                       | 0.0440                        | 1.65                               | 0.937 |
| 20                | 23.55                                       | 0.0472                        | 1.55                               | 0.966 |

**Table S2.** Comparison of different adsorbents tested in the removal of MB.

| Adsorbent                                                 | Maximum adsorption<br>capacity (mg·g <sup>-1</sup> ) | Reference |
|-----------------------------------------------------------|------------------------------------------------------|-----------|
| Clinoptilolite/chitosan/EDTA                              | 44.84                                                | 1         |
| Chitosan-gelatin@tin(IV)<br>Tungstatophosphate            | 3.72                                                 | 2         |
| Chitosan/clay/Fe <sub>2</sub> O <sub>3</sub>              | 45.1                                                 | 3         |
| Chitosan/zeolite composite                                | 24.5                                                 | 4         |
| Graphene-Fe <sub>3</sub> O <sub>4</sub> /calcium alginate | 37.04                                                | 5         |
| S-CNF                                                     | 36.97                                                | 6         |
| HNT sponges                                               | 45.59                                                | 7         |
| CNCs                                                      | 101.16                                               | 8         |
| PD-CNCs                                                   | 130.04                                               | 9         |
| CNC-HNT-0.4                                               | 59.15                                                | This work |

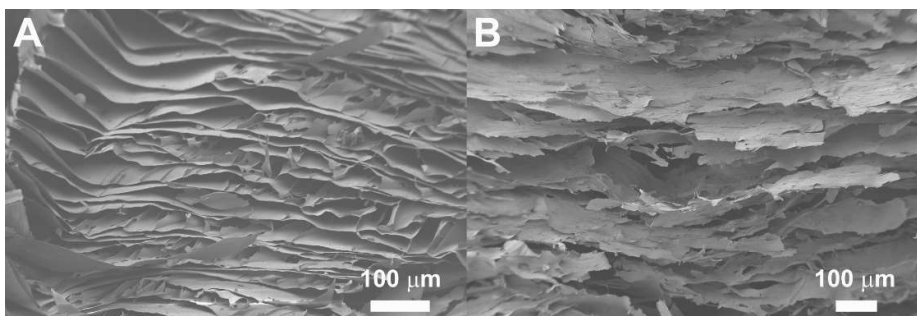

**Fig. S17** SEM images for CNC-HNT sorbents (A) before and (B) after MB adsorption.

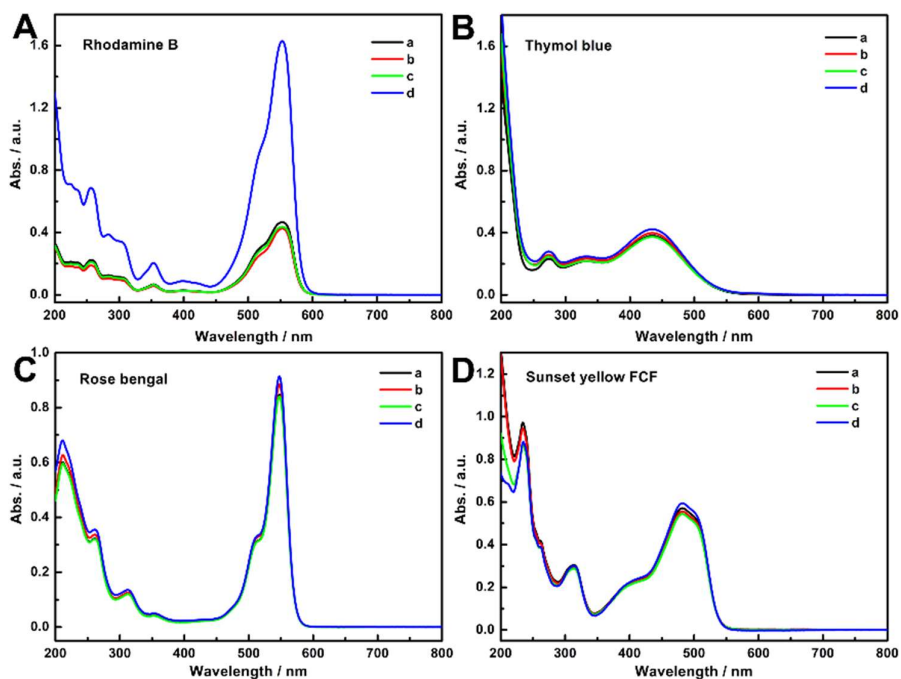

**Fig. S18** UV-vis spectra of different types of dyes' solution after adsorption onto CNC-HNT-0.4. For each experiment, 10 mL of dye solution ( $10 \text{ mg}\cdot\text{L}^{-1}$ ) was combined with 4 mg of CNC-HNT-0.4 and stirred for 360 min at room temperature. Then, UV-vis spectra were obtained to monitor the change in dye concentration in the solution. In each graph, trace a represents the original dye solution, and traces b-d show three independent adsorptive results. Note that thymol blue and sunset yellow FCF are anionic, rhodamine B is cationic, and rose bengal is neutral.

## References

1. F. Aeenjan and V. Javanbakht, Methylene blue removal from aqueous solution by magnetic clinoptilolite/chitosan/EDTA nanocomposite, *Res. Chem. Intermed.*, **2018**, *44*, 1459–1483.
2. K. Kaur, R. Jindal and R. Tanwar, Chitosan–gelatin@tin (IV) tungstatophosphate nanocomposite ion exchanger: synthesis, characterization and applications in environmental remediation, *J. Polym. Environ.*, **2019**, *27*, 19–36.
3. D. W. Cho, B. H. Jeon, C. M. Chon, F. W. Schwartz, Y. Jeong and H. Song, Magnetic chitosan composite for adsorption of cationic and anionic dyes in aqueous solution, *J. Ind. Eng. Chem.*, **2015**, *28*, 60–66.
4. M. H. Dehghani, A. Dehghan, H. Alidadi, M. Dolatabadi, M. Mehrabpour and A. Converti, Removal of methylene blue dye from aqueous solutions by a new chitosan/zeolite composite from shrimp waste: kinetic and equilibrium study, *Korean J. Chem. Eng.*, **2017**, *34* (6), 1699–1707.
5. N. Song, X. L. Wu, S. Zhong, H. Lin and J. R. Chen, Biocompatible G-Fe<sub>3</sub>O<sub>4</sub>/CA nanocomposites for the removal of methylene blue, *J. Mol. Liq.*, **2015**, *212*, 63–69.
6. D. Wang, H. Yu, X. Fan, J. Gu, S. Ye, J. Yao and Q. Ni, High aspect ratio carboxylated cellulose nanofibers cross-linked to robust aerogels for superabsorption-flocculants: paving way from nanoscale to macroscale, *ACS Appl. Mater. Interfaces*, **2018**, *10*, 20755–20766.
7. T. Xu, F. Zheng, Z. Chen, Y. Ding, Z. Liang, Y. Liu, Z. Zhu and H. Fong, Halloysite nanotubes sponges with skeletons made of electrospun nanofibers as innovative dye adsorbent and catalyst support, *Chem. Eng. J.*, **2019**, *360*, 280–288.
8. X. He, K. B. Male, P. N. Nesterenko, D. Brabazon, B. Paull and J. H. T. Luong, Adsorption and desorption of methylene blue on porous carbon monoliths and nanocrystalline cellulose, *ACS Appl. Mater. Interfaces*, **2013**, *5*, 8796–8804.
9. N. Mohammed, H. Lian, M. S. Islam, M. Strong, Z. Shi, R. M. Berry, H. Y. Yu and K. C. Tam, Selective adsorption and separation of organic dyes using functionalized cellulose nanocrystals, *Chem. Eng. J.*, **2021**, *417*, 129237.
